# Supplementary material for: Dual electron transfer path and LSPR photothermal enhancement in BiOCl@ZnIn2S4 heterojunction for enhanced photocatalytic H2 evolution, H2O2 production and tetracycline removal
Source: Royal Society of Chemistry journal article supplement (doi:10.1039/d4qi02806f), 2025-01-01
Supplement: d4qi02806f1.pdf [file d4qi02806f1.pdf]

## Supporting Information

### **Dual electron transfer path and LSPR photothermal enhancement in BiOCl@ZnIn<sub>2</sub>S<sub>4</sub> heterojunction for enhanced photocatalytic H<sub>2</sub> evolution, H<sub>2</sub>O<sub>2</sub> production and tetracycline removal**

Fan Wu<sup>a</sup>, Guangyu Wu<sup>a, b\*</sup>, Yonggong Tang<sup>a</sup>, Yuwei Pan<sup>a</sup>, Jiangang Han<sup>c</sup>, Jin Zhang<sup>d</sup>,  
Weinan Xing<sup>a</sup>, Yudong Huang<sup>e</sup>

- a. College of Ecology and Environment, Co-Innovation Center for the Sustainable Forestry in Southern China, Nanjing Forestry University, Nanjing 210037, China
- b. Guangxi Key Laboratory of Petrochemical Resource Processing and Process Intensification Technology, School of Chemistry and Chemical Engineering, Guangxi University, Nanning 530004, China
- c. School of Chemical Engineering and Materials, Changzhou Institute of Technology, Changzhou 213032, China
- d. State Key Laboratory of Chemical Engineering, School of Chemical Engineering, East China University of Science and Technology, Shanghai 200237, China
- e. MIIT Key Laboratory of Critical Materials Technology for New Energy Conversion and Storage, School of Chemistry and Chemical Engineering, Harbin Institute of Technology, Harbin, 150001, China

E-mail: gywuchem@njfu.edu.cn

## Materials

All chemicals used in this experiment were analytically pure and required no further purification.  $\text{Bi}(\text{NO}_3)_3 \cdot 5\text{H}_2\text{O}$ ,  $\text{ZnCl}_2$ , L-histidine ( $\text{C}_6\text{H}_9\text{N}_2\text{O}_2$ , L-his), p-benzoquinone ( $\text{C}_6\text{H}_4\text{O}_2$ , BQ), Acetonitrile ( $\text{C}_2\text{H}_3\text{N}$ ) and Triethanolamine ( $\text{C}_6\text{H}_{15}\text{NO}_3$ ) were purchased from Shanghai Macklin Biochemical Co., Ltd.  $[\text{Ru}(\text{bpy})_3]\text{Cl}_2 \cdot 6\text{H}_2\text{O}$  was purchased from Shanghai Aladdin Biochemical Technology Co., Ltd. EDTA, KCl and tert-butanol ( $\text{C}_4\text{H}_{10}\text{O}$ , TBA) were purchased from Sinopharm Chemical Reagent Co., Ltd. Ethylene glycol ( $\text{C}_2\text{H}_6\text{O}_2$ ) was purchased from Nanjing Chemical Reagent Co., Ltd. Thanol ( $\text{C}_2\text{H}_5\text{OH}$ ) was purchased from Shanghai Titan Scientific Co., Ltd. TC was purchased from Sun Chemical Technology (Shanghai) Co., Ltd. Thioacetamide (TAA) and  $\text{InCl}_3 \cdot 4\text{H}_2\text{O}$  were purchased from Shanghai Yien Chemical Technology Co., Ltd.

## Characterization

The functional group information of the sample were observed through Fourier transform infrared spectroscopy (FT-IR, Bruker VERTEX 80V, Germany). The composition and crystal structure of the samples was identified by X-ray diffraction (XRD, Rigaku Ultima IV, Japan). The micro morphology and the internal fine structure of composite materials were obtained by scanning electron microscope (SEM, JEOL 7600F, Japan) and transmission electron microscope (TEM, JEOL JEM 2100, Japan). UV-Vis DRS (Shimadzu UV-3600) was used to evaluate the optical absorption characteristics and calculate the band gap. X-ray photoelectron spectroscopy (XPS, Thermo Fisher escalab 250xi, USA) was used to further understand the elemental

composition and valence information of materials. PL spectra were tested by FLS980 (Edinburgh, Britain). The separation effect and photoelectric properties of the photocatalyst were studied by photoluminescence spectroscopy, transient photocurrent response and electrochemical impedance spectroscopy (CHI-760E).

### **Photoelectrochemical test**

Mott-Schottky experiments (M-S) were conducted on a CHI 760E electrochemical workstation with the universal three-electrode test system. In a 2 mL test tube, 5 mg of material, 1 mL of ethanol and 10  $\mu$ L of nafion solution were added as dispersant and then sonicated for 2 min to form a homogeneous mixed solution. Subsequently, the working electrode was prepared by uniformly applying the mixed solution onto an indium tin oxide (ITO) glass conductive surface with an active area of 1 cm<sup>2</sup>, and dried at 60°C for 6 hours. A graphite electrode and Ag/AgCl electrode were used as the counter electrode and reference electrode, respectively. 0.5 M Na<sub>2</sub>SO<sub>4</sub> solution was used as the electrolyte. The Mott-Schottky experiments were conducted at the frequency of 800, 1000 and 1200 Hz. The potential was calibrated by normal hydrogen electrode (NHE) and the formula was as the following:

$$E_{\text{NHE}} = E_{\text{Ag/AgCl}} + 0.0592 \text{ pH} + 0.198 \text{ eV}$$

Where  $E_{\text{NHE}}$  was the corrected potential vs. NHE,  $E_{\text{Ag/AgCl}}$  was the measured potential vs. Ag/AgCl electrode, and pH was 6.8 at 25°C.

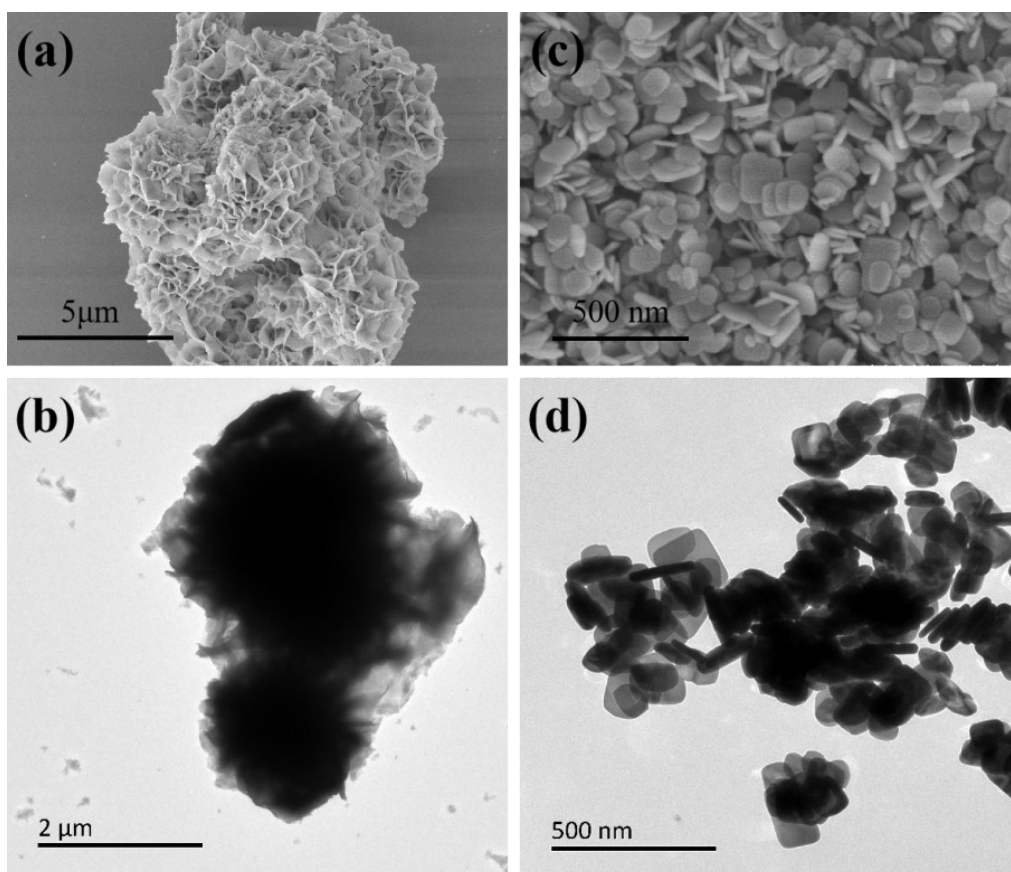

**Fig. S1** SEM and TEM image of ZIS (a, b) and BiOCl (c, d).

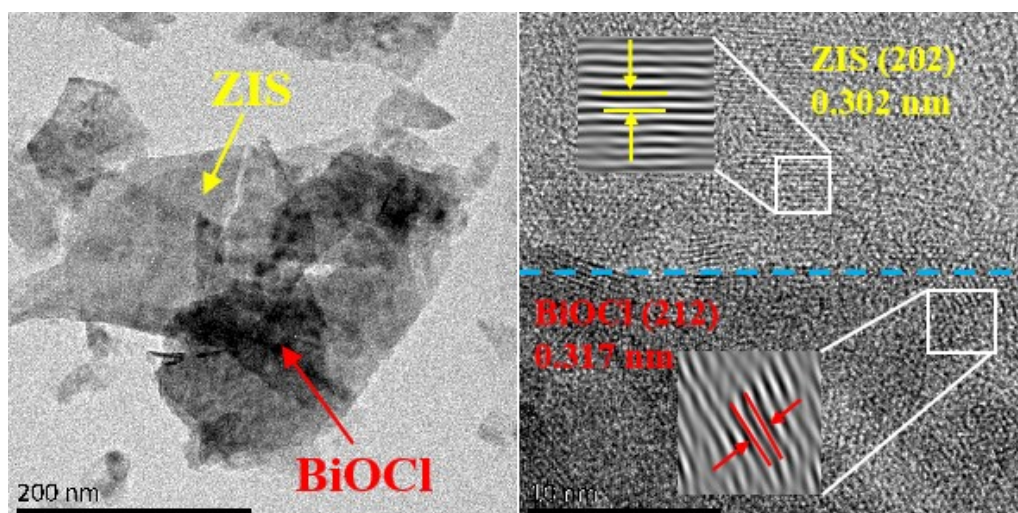

**Fig. S2** HRTEM image of BiOCl@ZIS-1%.

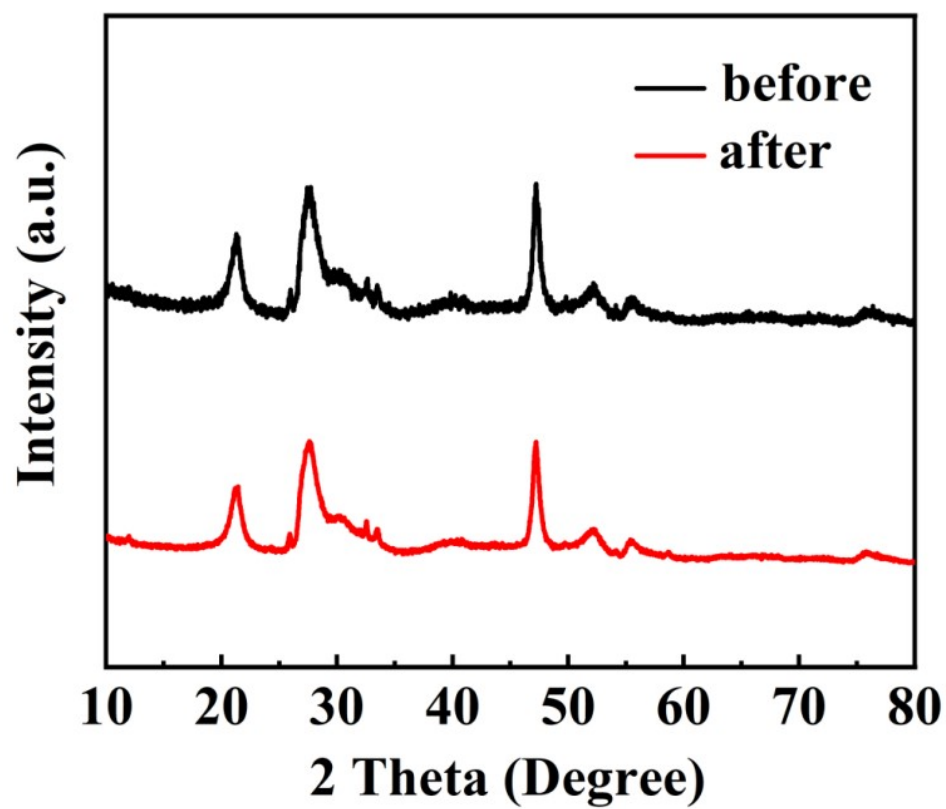

**Fig. S3** XRD comparison of BiOCl@ZIS-1% before and after reaction.

**Tab. S1** Comparison of H<sub>2</sub> generation with different catalysts of same conditions

| Materials                                                                                        | Time (min) | H <sub>2</sub> generation                     | Reference |
|--------------------------------------------------------------------------------------------------|------------|-----------------------------------------------|-----------|
| CoZnS@NSC-15/g-C <sub>3</sub> N <sub>4</sub>                                                     | 240        | 610.8 $\mu\text{mol h}^{-1} \text{g}^{-1}$    | 1         |
| NiSe/ZIS                                                                                         | 150        | 3240.0 $\mu\text{mol h}^{-1} \text{g}^{-1}$   | 2         |
| C@TiO <sub>2</sub>                                                                               | 180        | 400.0 $\mu\text{mol h}^{-1} \text{g}^{-1}$    | 3         |
| In <sub>2</sub> O <sub>3</sub> /In <sub>2</sub> S <sub>3</sub> -CdIn <sub>2</sub> S <sub>4</sub> | 240        | 2892.0 $\mu\text{mol h}^{-1} \text{g}^{-1}$   | 4         |
| ZIS/CN/ATP                                                                                       | 180        | 3906.2 $\mu\text{mol h}^{-1} \text{g}^{-1}$   | 5         |
| SnO <sub>2</sub> /BaSO <sub>4</sub>                                                              | 240        | 5260 $\mu\text{mol h}^{-1} \text{g}^{-1}$     | 6         |
| PBA/PTI-2                                                                                        | 120        | 460.0 $\mu\text{mol h}^{-1} \text{g}^{-1}$    | 7         |
| MO/C@ZIS                                                                                         | 240        | 2357.0 $\mu\text{mol h}^{-1} \text{g}^{-1}$   | 8         |
| CIS/CeO <sub>2</sub>                                                                             | 180        | 226.6 $\mu\text{mol h}^{-1} \text{g}^{-1}$    | 9         |
| BiOCl@ZIS-1%                                                                                     | 240        | 13689.78 $\mu\text{mol h}^{-1} \text{g}^{-1}$ | This work |

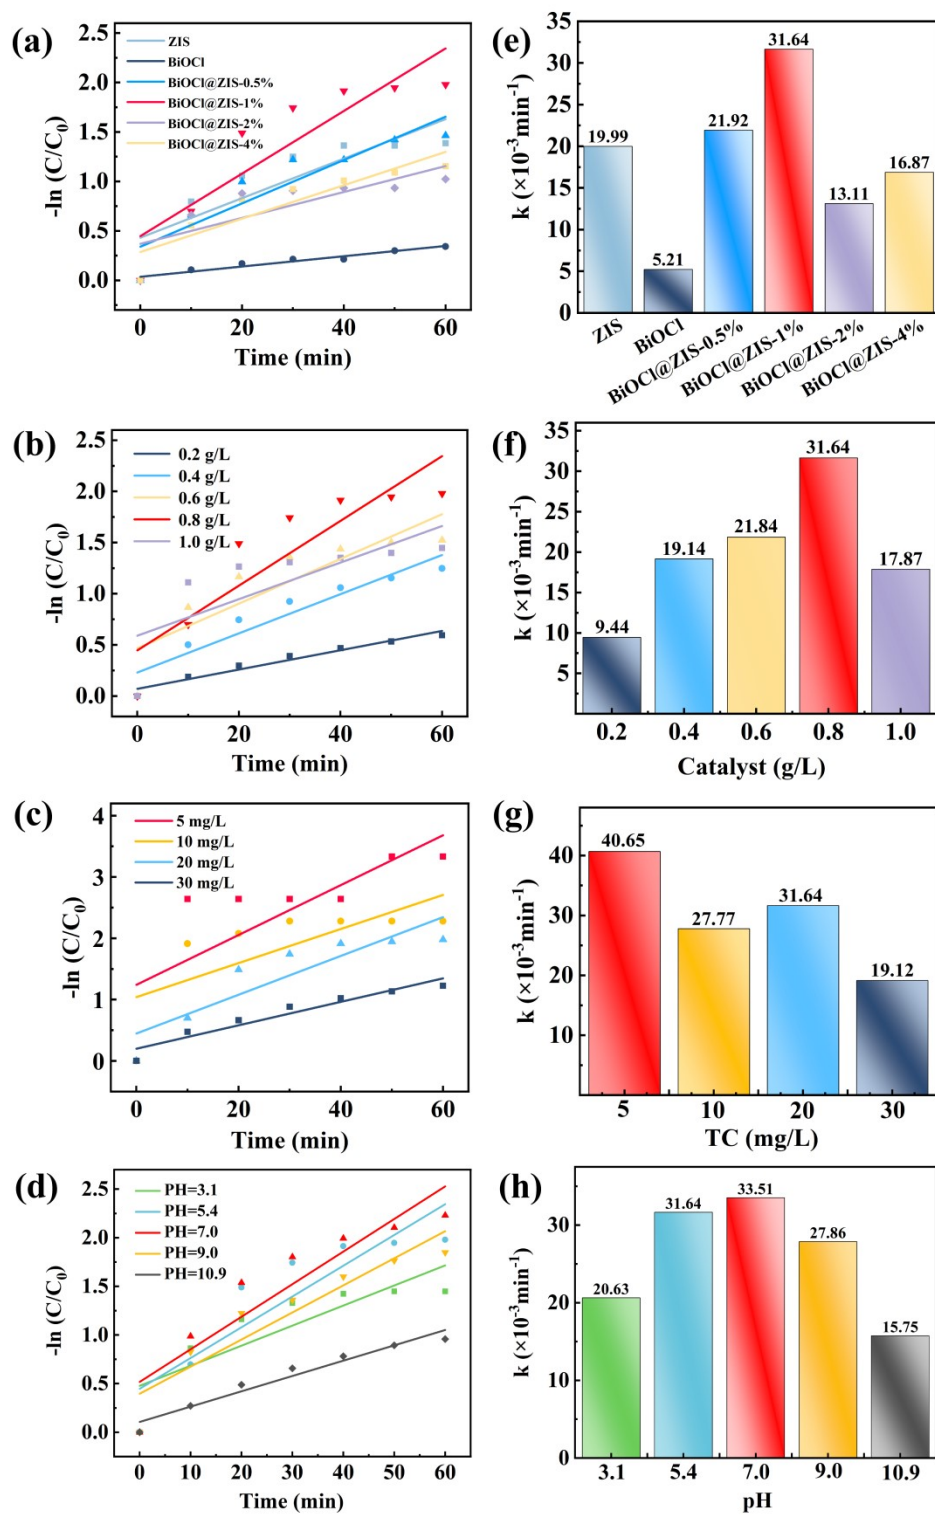

**Fig. S4** Quasi-first-order kinetic equations and degradation rate constants of (a, e) different catalysts; (b, f) dosage; (c, g) TC concentration and (d, h) pH for TC degradation.



**Tab. S2** Comparison of TC degradation with different catalysts

| Materials                             | Degradation efficiency (%) | Time (min) | Reference |
|---------------------------------------|----------------------------|------------|-----------|
| HOP                                   | 84.60                      | 40         | 10        |
| BWO-Ox                                | 79.68                      | 180        | 11        |
| sp <sup>2</sup> c-COF                 | 73.50                      | 90         | 12        |
| CuO-NCP                               | 67.00                      | 300        | 13        |
| CMCD-TiO@FeO@RGO                      | 83.30                      | 60         | 14        |
| BFO/rGO                               | 83.73                      | 60         | 15        |
| CuFeO/g-CN/rGO                        | 67.00                      | 150        | 16        |
| Bi <sub>2</sub> O <sub>4</sub> @FeOOH | 84.20                      | 120        | 17        |
| BiOI/BiOI <sub>3</sub>                | 75.90                      | 270        | 18        |
| AgCl/WO/g-CN                          | 76.30                      | 60         | 19        |
| TiC-SOH/g-CN                          | 75.42                      | 120        | 20        |
| BiOCl@ZIS-1%                          | 86.00                      | 60         | This work |

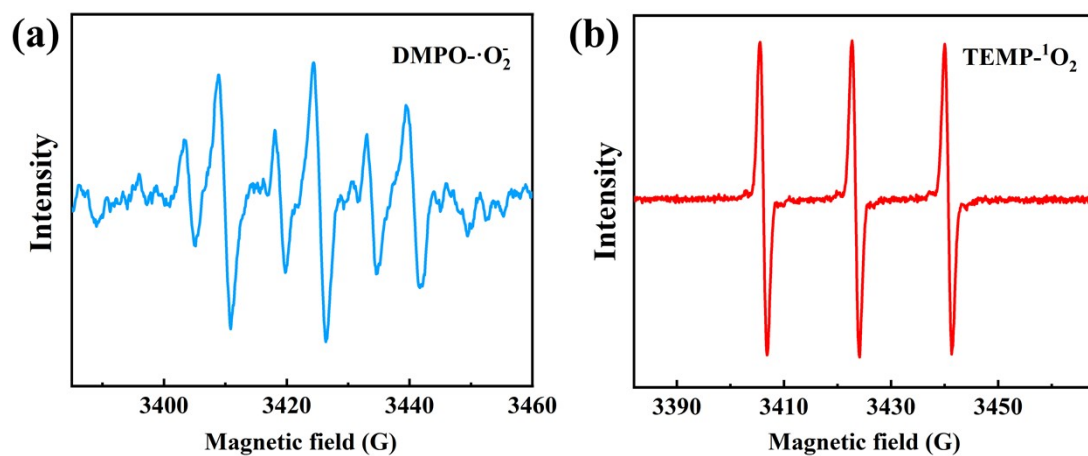

**Fig. S5** EPR spectra of BiOCl@ZIS-1% in the presence of (a) DMPO and (b) TEMP.

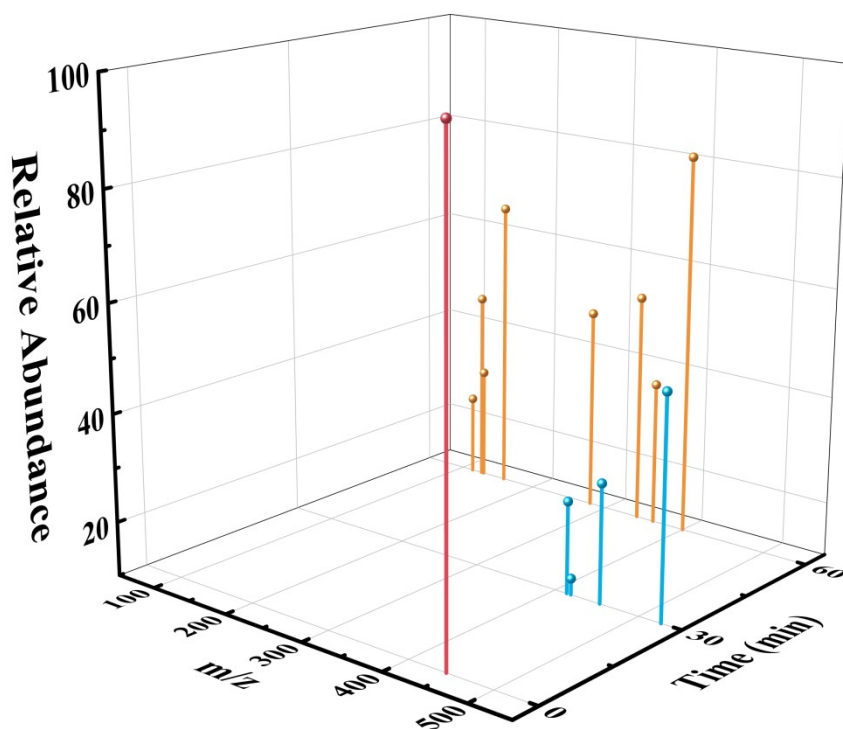

**Fig. S6** Mass spectra of TC over BiOCl/ZIS-1% at 0 min, 30 min and 60 min.

**Tab. S3** Comparison of H<sub>2</sub>O<sub>2</sub> production with different catalysts in the same condition

| Materials                                             | Time (h) | Dosage (mg) | Solution volume (mL) | H <sub>2</sub> O <sub>2</sub> production  | Reference |
|-------------------------------------------------------|----------|-------------|----------------------|-------------------------------------------|-----------|
| BIO-OVs-2                                             | 2        | 50          | 50                   | 4310 $\mu\text{M h}^{-1} \text{g}^{-1}$   | 21        |
| Au(0.50)@MoS <sub>2</sub>                             | 12       | 50          | 50                   | 1018.7 $\mu\text{M h}^{-1} \text{g}^{-1}$ | 22        |
| BU-3                                                  | 1        | 50          | 50                   | 144.6 $\mu\text{M h}^{-1} \text{g}^{-1}$  | 23        |
| g-C <sub>3</sub> N <sub>4</sub> -0.05                 | 4        | 30          | 30                   | 704.0 $\mu\text{M h}^{-1} \text{g}^{-1}$  | 24        |
| Au <sub>0.1</sub> Ag <sub>0.2</sub> /TiO <sub>2</sub> | 24       | 5           | 5                    | 2833.3 $\mu\text{M h}^{-1} \text{g}^{-1}$ | 25        |
| Pt@ $\beta$ -CD/C <sub>3</sub> N <sub>4</sub> -M      | 1        | 60          | 60                   | 147.1 $\mu\text{M h}^{-1} \text{g}^{-1}$  | 26        |
| SCNx                                                  | 2        | 10          | 50                   | 8334 $\mu\text{M h}^{-1} \text{g}^{-1}$   | 27        |
| BiOCl@ZIS-1%                                          | 120      | 10          | 50                   | 9670 $\mu\text{M h}^{-1} \text{g}^{-1}$   | This work |

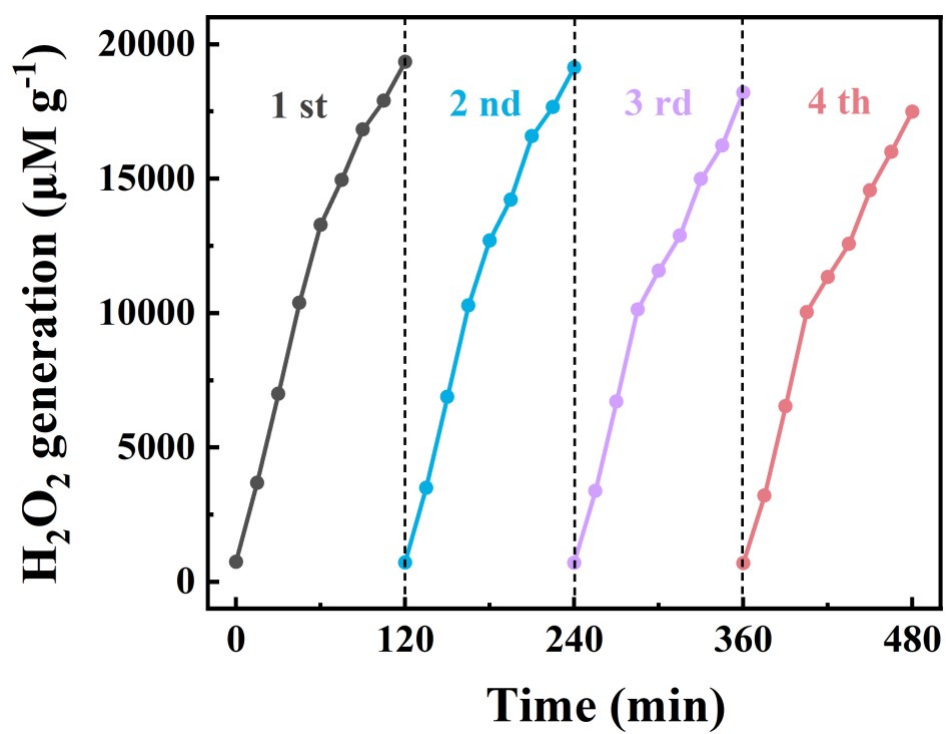

Fig. S7 Photocatalytic  $\text{H}_2\text{O}_2$  production stability of  $\text{BiOCl@ZIS-1\%}$ .

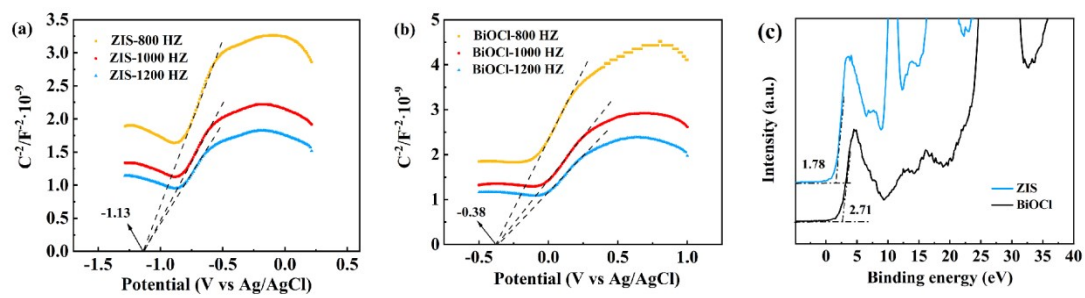

**Fig. S8** (a, b) Mott-Schottky curves and (c) Valence bands (Ed) of BiOCl and ZIS.

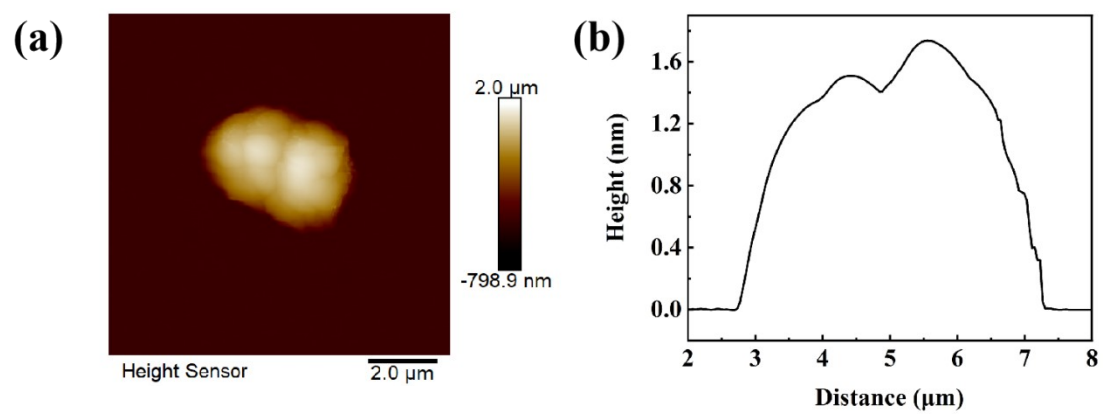

**Fig. S9** AFM image of BiOCl@ZIS-1%.

## Reference

1. X. J. Lu, I. Ullah, J. H. Li, S. Chen, C. Z. Yuan and A. W. Xu, A bimetallic CoZn metal-organic-framework derived CoZnS@NSC Co-catalyst loaded on gC<sub>3</sub>N<sub>4</sub> for significantly augmented photocatalytic H<sub>2</sub> evolution, *Inorg. Chem. Front.*, 2024, **11**, 3435-3445.
2. S. Mansoor, Z. Hu, Y. Zheng, M. Tayyab, M. Khan, Z. Akmal, L. Zhou, J. Lei and J. Zhang, Comparative study of photocatalytic H<sub>2</sub> production by nickel chalcogenides<sub>1+x</sub> based Zn<sub>3</sub>In<sub>2</sub>S<sub>6</sub> photocatalytic system, *Sep. Purif. Technol.*, 2024, **353**, 128357.
3. Y. Deligiannakis, E. Bletsa, E. Mouzourakis, M. Solakidou and K. Adamska, Carbon-Coated TiO<sub>2</sub> Nanoparticles for Noble-Metal-Free Photocatalytic H<sub>2</sub> Production from H<sub>2</sub>O, *ACS Appl. Nano Mater.*, 2024, **7**, 11621-11633.
4. Y. Qi, G. Zhou, Y. Wu, H. Wang, Z. Yan and Y. Wu, In-situ construction of In<sub>2</sub>O<sub>3</sub>/In<sub>2</sub>S<sub>3</sub>-CdIn<sub>2</sub>S<sub>4</sub> Z-scheme heterojunction nanotubes for enhanced photocatalytic hydrogen production, *J. Colloid Interf. Sci.*, 2024, **664**, 107-116.
5. B. Wang, L. Huang, T. Peng, R. Wang, J. Jin, H. Wang, B. He and Y. Gong, Attapulgite-intercalated g-C<sub>3</sub>N<sub>4</sub>/ZnIn<sub>2</sub>S<sub>4</sub> 3D hierarchical Z-scheme heterojunction for boosting photocatalytic hydrogen production, *J. Colloid Interf. Sci.*, 2024, **675**, 52-63.
6. C. Cheng, J. Zhang, H. Jia, X. Ding, G. Dong, F. Chen, Y. Hu and J. Shi, One-pot synthesis of amorphous/crystalline SnO<sub>2</sub>/BaSO<sub>4</sub> composite sensitized with Eosin Y for enhanced photocatalytic H<sub>2</sub> production, *J. Environ. Chem. Eng.*,



2024, **12**, 112770.

7. Y. Ren, Y. Li, G. Pan, N. Wang, X. Liu and Z. Wu, A novel all-organic S-scheme heterojunction with rapid interfacial charges migration for efficient photocatalytic H<sub>2</sub> production, *J. Mater. Sci. Technol.*, 2024, **201**, 12-20.
8. X. Zhang, H. Ye, Z. Zeng, K. Sa, J. Jia, Z. Yang, S. Xu, C. Han and Y. Liang, Bridging the gap between metallic MoO<sub>2</sub> and ZnIn<sub>2</sub>S<sub>4</sub> for enhanced photocatalytic H<sub>2</sub> production, *Sep. Purif. Technol.*, 2024, **347**, 127624.
9. J. Wang, X. Niu, Q. Hao, K. Zhang, X. Shi, L. Yang, H. Y. Yang, J. Ye and Y. Wu, Promoting charge separation in CuInS<sub>2</sub>/CeO<sub>2</sub> photocatalysts by an S-scheme heterojunction for enhanced photocatalytic H<sub>2</sub> production, *Chem. Eng. J.*, 2024, **493**, 152534.
10. Y. Zhao, L. Chang, Y. Li, W. He, K. Liu, M. Cui, M. U. Hameed and J. Xie, High-gravity photocatalytic degradation of tetracycline hydrochloride under simulated sunlight, *J. Water Process Eng.*, 2023, **53**, 103753.
11. L. Chen, B. Xu, M. Jin, L. Chen, G. Yi, B. Xing, Y. Zhang, Y. Wu and Z. Li, Excellent photocatalysis of Bi<sub>2</sub>WO<sub>6</sub> structured with oxygen vacancies in degradation of tetracycline, *J. Mol. Struct.*, 2023, **1278**, 134911.
12. Z. Hu, Y. Luo, L. Wang, Y. Wang, Q. Wang, G. Jiang, Q. Zhang and F. Cui, Synthesis of Pyrene-Based Covalent Organic Frameworks for Photocatalytic Tetracycline Degradation, *ACS Appl. Polym. Mater.*, 2023, **5**, 9263-9273.
13. M. Saberian and A. Nezamzadeh-Ejhi, Synergistic photocatalytic degraded tetracycline upon supported CuO clinoptilolite nanoparticles, *Solid State Sci.*,

- 2024, **147**, 107381.
14. Z. Liu, G. Wang, Y. Li, H. Li and N. Deng, Carboxymethyl- $\beta$ -cyclodextrin functionalized  $\text{TiO}_2@\text{Fe}_3\text{O}_4@\text{RGO}$  magnetic photocatalyst for efficient photocatalytic degradation of tetracycline under visible light irradiation, *J. Environ. Chem. Eng.*, 2024, **12**, 113303.
  15. Z. Wu, J. Liu, J. Shi and H. Deng,  $\text{Bi}_2\text{Fe}_4\text{O}_9/\text{rGO}$  nanocomposite with visible light photocatalytic performance for tetracycline degradation, *Environ. Res.*, 2024, **249**, 118361.
  16. R. Rajendran, O. Rojviroon, V. Vasudevan, P. Arumugam, M. Handayani, N. Akechatree, Y. Leelert and T. Rojviroon, Magnetically separable ternary heterostructure photocatalyst  $\text{CuFe}_2\text{O}_4/\text{g-C}_3\text{N}_4/\text{rGO}$ : Enhancing photocatalytic degradation and bacterial inactivation, *J. Water Process Eng.*, 2024, **63**, 105443.
  17. Y. Sun, Y. Tang, F. Chen, P. Huang, W. Sun and Y. Song, Amorphous  $\text{FeOOH}$  shell decorated  $\text{Bi}_2\text{O}_3$  for the boosted photocatalytic degradation of tetracycline under visible irradiation, *J. Environ. Chem. Eng.*, 2024, **12**, 112181.
  18. W. Mu, L. Wang and C. Chang, Photocatalytic adsorption/degradation of tetracycline by S-scheme  $\text{BiOI}/\text{BiOI/O}_3$  pn heterojunction from dissociation of  $\text{BiOI/O}_3$  in-situ solvothermal process, *J. Environ. Manag.*, 2024, **356**, 120630.
  19. S. Pu, Q. Zhao, X. Luo, D. Wang, K. Lei, Y. Duan, L. Mao, W. Feng and Y. Sun, In-situ synthesis of  $\text{AgCl}/\text{WO}_3$  loaded with  $\text{g-C}_3\text{N}_4$  as dual Z-scheme heterojunction for boosting photocatalytic degradation of antibiotics, *Surf.*

*Interf.*, 2024, **46**, 104016.

20. J. Zhang, C. Shao, Z. Lei, Y. Li, H. Bai, L. Zhang, G. Ren and X. Wang, Treatment of antibiotics in water by SO<sub>3</sub>H-modified Ti<sub>3</sub>C<sub>2</sub> Mxene photocatalytic collaboration with g-C<sub>3</sub>N<sub>4</sub>, *J. Mater. Sci. Technol.*, 2024, **194**, 124-137.
21. A. Yuan, T. Huang, Y. Guo, Y. Wei, H. Liu, B. Yang and B. Chang, BiOI/O<sub>3</sub> Nanoplates with Tailorable Surface Defects for Photocatalytic H<sub>2</sub>O<sub>2</sub> Production, *ACS Appl. Nano Mater.*, 2024, **7**, 12761-12772.
22. H. Song, L. Wei, C. Chen, C. Wen and F. Han, Photocatalytic production of H<sub>2</sub>O<sub>2</sub> and its in situ utilization over atomic-scale Au modified MoS<sub>2</sub> nanosheets, *J. Catal.*, 2019, **376**, 198-208.
23. Y. Yang, C. Zhang, D. Huang, G. Zeng, J. Huang, C. Lai, C. Zhou, W. Wang, H. Guo and W. Xue, Boron nitride quantum dots decorated ultrathin porous g-C<sub>3</sub>N<sub>4</sub>: Intensified exciton dissociation and charge transfer for promoting visible-light-driven molecular oxygen activation, *Appl. Catal. B: Environ.*, 2019, **245**, 87-99.
24. H. Zhang, L. Jia, P. Wu, R. Xu, J. He and W. Jiang, Improved H<sub>2</sub>O<sub>2</sub> photogeneration by KOH-doped g-C<sub>3</sub>N<sub>4</sub> under visible light irradiation due to synergistic effect of N defects and K modification, *Appl. Surf. Sci.*, 2020, **527**, 146584.
25. D. Tsukamoto, A. Shiro, Y. Shiraishi, Y. Sugano, S. Ichikawa, S. Tanaka and T. Hirai, Photocatalytic H<sub>2</sub>O<sub>2</sub> production from ethanol/O<sub>2</sub> system using TiO<sub>2</sub>

- loaded with Au-Ag bimetallic alloy nanoparticles, *ACS catal.*, 2012, **2**, 599-603.
26. H. Zhu, Q. Xue, G. Zhu, Y. Liu, X. Dou and X. Yuan, Decorating Pt@cyclodextrin nanoclusters on C<sub>3</sub>N<sub>4</sub>/MXene for boosting the photocatalytic H<sub>2</sub>O<sub>2</sub> production, *J. Mater. Chem. A.*, 2021, **9**, 6872-6880.
27. Y. Li, W. Wang, Y. Wang, H. He, X. Yu, D. Xia, L. Deng and Y.-N. Liu, Edge engineering of carbon nitride for enhanced sacrificial agent-free photocatalytic H<sub>2</sub>O<sub>2</sub> evolution, *Chem. Eng. Sci.*, 2023, **282**, 119333.
